# Supplementary material for: Vanadium doped CaTiO3 cuboids: role of vanadium in improving the photocatalytic activity
Source: Royal Society of Chemistry journal article supplement (doi:10.1039/d1na00468a), 2021-01-01
Supplement: d1na00468a1.pdf [file d1na00468a1.pdf]

## Supplementary Information

### Vanadium doped CaTiO<sub>3</sub> cuboids: Role of vanadium in improving the photocatalytic activity

Harsha Bantawal<sup>a</sup>, U Sandhya Shenoy<sup>b\*</sup> and D Krishna Bhat<sup>a\*</sup>

<sup>a</sup>Department of Chemistry, National Institute of Technology Karnataka, Surathkal,  
Mangalore-575025, India.

<sup>b</sup>Department of Chemistry, College of Engineering and Technology, Srinivas University,  
Mukka, Mangalore-574146, India.

\*Corresponding author E-mail address: [denthajekb@gmail.com](mailto:denthajekb@gmail.com);  
[sandhyashenoy347@gmail.com](mailto:sandhyashenoy347@gmail.com)

## Characterization

The crystal structure and phase purity of the synthesized materials were analysed by using an X-ray diffractometer (XRD, Rigaku Miniflex 600) equipped with monochromatic Cu  $K_{\alpha}$  radiation ( $\lambda = 0.154$  nm) at a scan rate of  $2^{\circ}$  per minute in the  $2\theta$  range of  $20^{\circ}$ - $80^{\circ}$ . The surface morphology of the synthesized semiconductor samples was analysed using field emission scanning electron microscopy (FESEM), transmission electron microscopy (TEM) and high-resolution transmission electron microscopy (HRTEM) (JEOL/JEM 2100). X-ray photoelectron spectrum (XPS) was recorded using Kratos XSAM 800 spectrometer equipped with an Al  $K_{\alpha}$  source. The specific surface area was determined using the Brunauer-Emmett-Teller (BET) method (BEL SORP II, JAPAN). The diffuse reflectance (DR) spectra were recorded using a UV-visible spectrometer (DRS, DR SPECORD S600 Analytic Jena). The photoluminescence (PL) spectra were recorded at room temperature using a fluorescence spectrometer (LS-55, PerkinElmer).

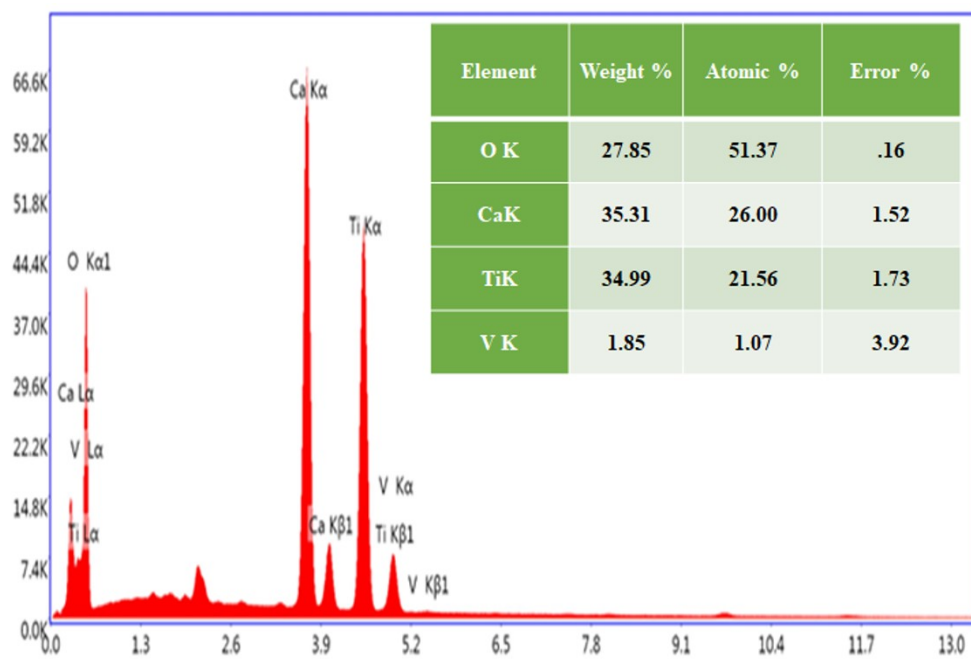

**Figure S1.** EDX spectrum of 1.0 V. Inset shows the elemental percentage.

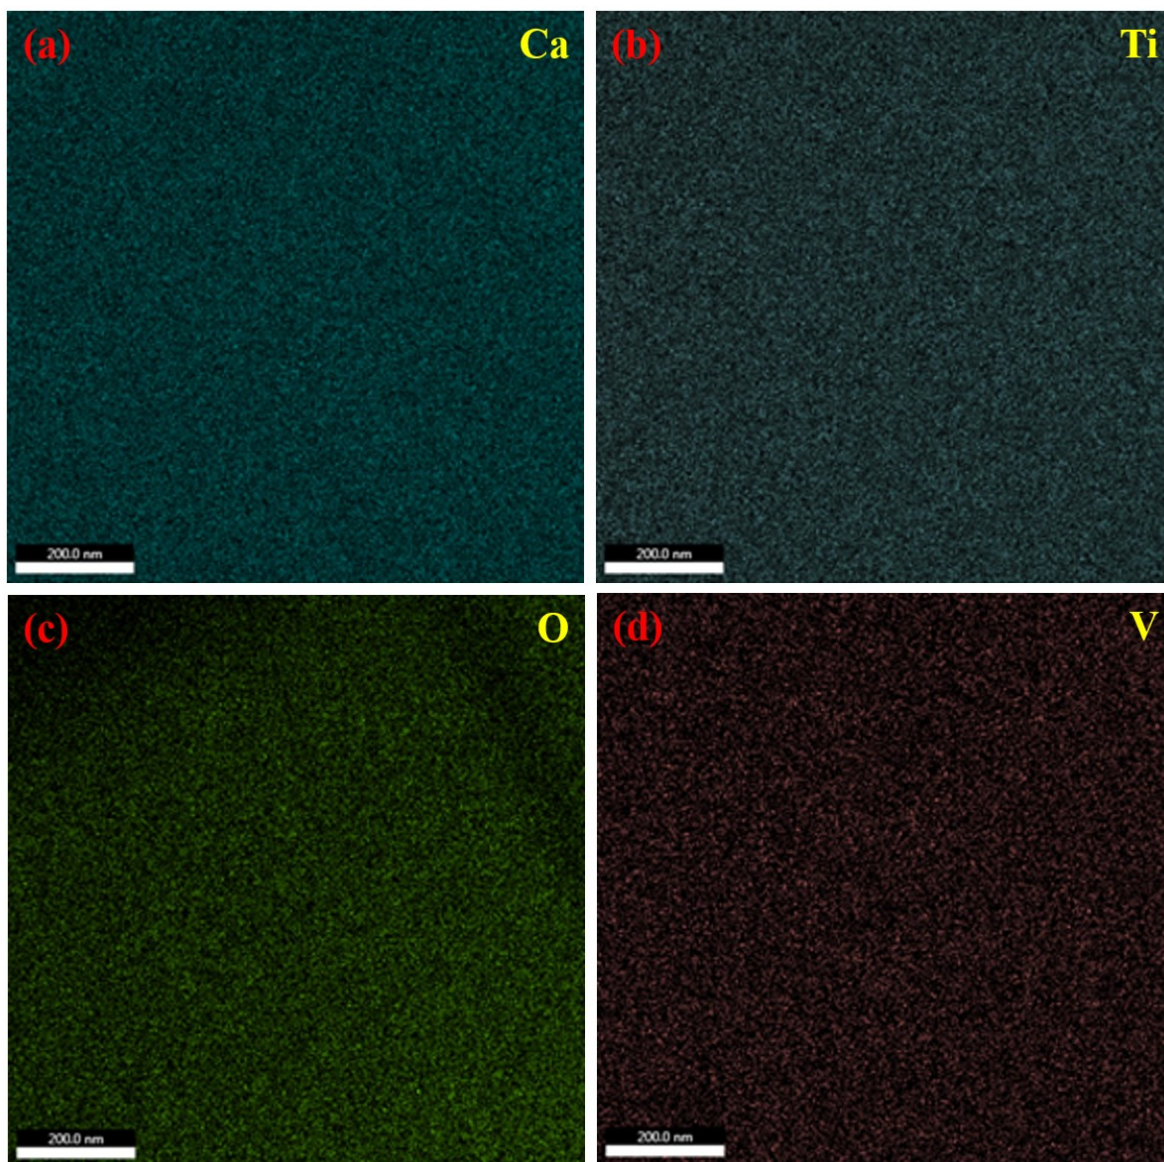

**Figure S2.** Elemental mapping of a) Ca; b) Ti; c) O; d) V.

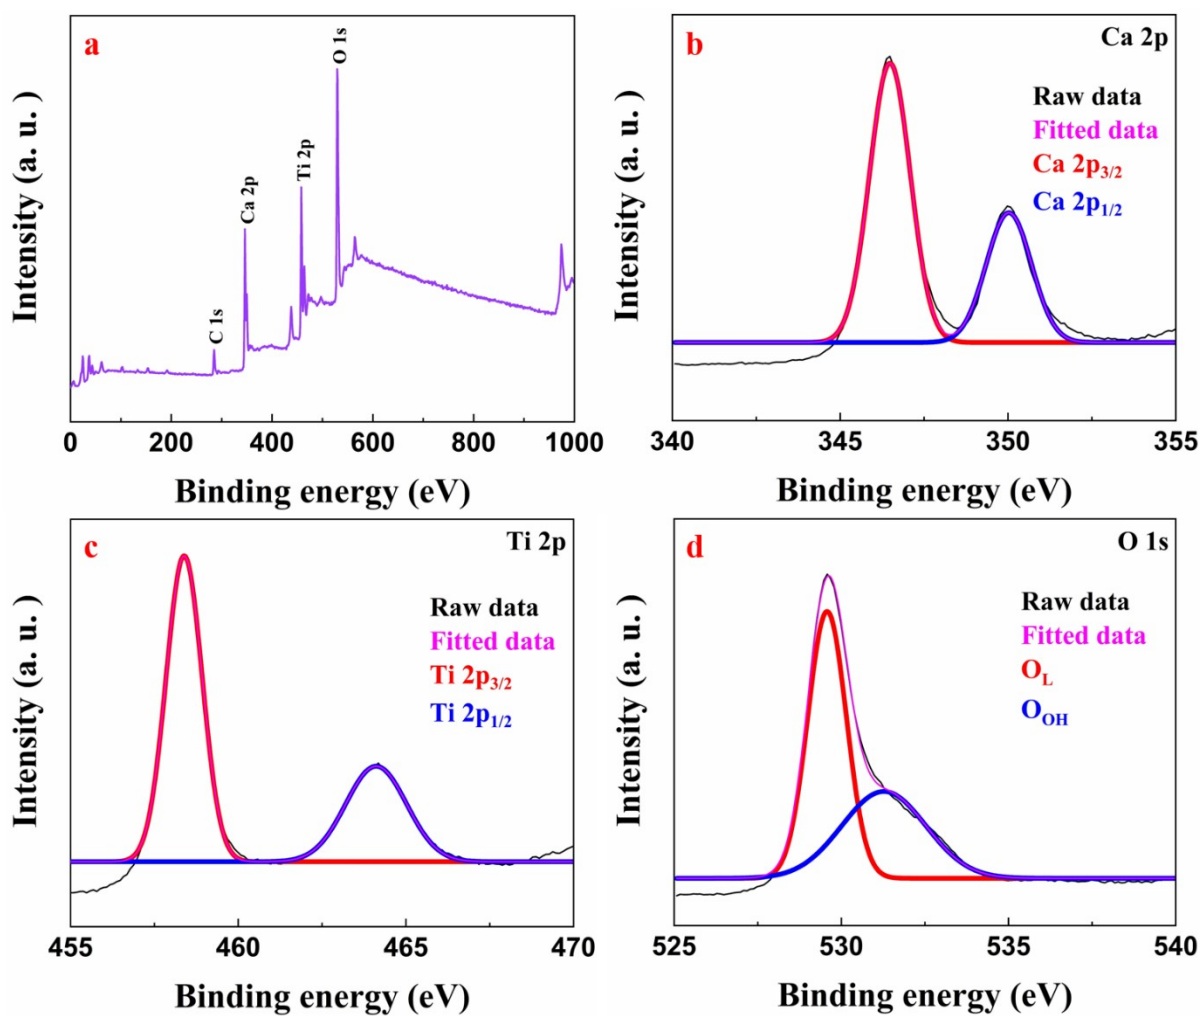

**Figure S3.** a) XPS survey spectrum of CaTiO<sub>3</sub>; High resolution XPS spectrum of b) Ca 2p; c) Ti 2p; d) O 1s in CaTiO<sub>3</sub>.

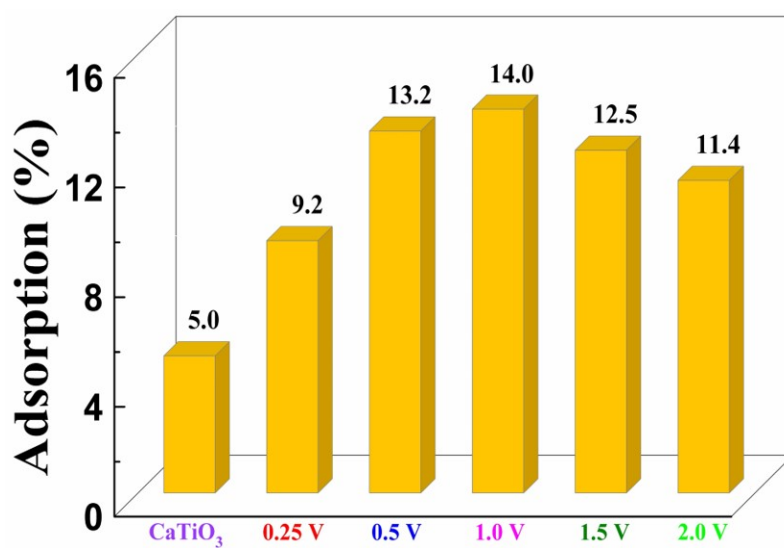

**Figure S4.** Adsorption percentage of MB on CaTiO<sub>3</sub> and V doped CaTiO<sub>3</sub> determined by experiments carried out in dark.

**Table S1.** Comparison of photocatalytic activity of 1.0 V sample with reported literatures.

| Photocatalysts                                                       | Light source                                                           | Test sample    | Degradation extent and Time                     | Reference                      |
|----------------------------------------------------------------------|------------------------------------------------------------------------|----------------|-------------------------------------------------|--------------------------------|
| 1.0 V                                                                | Visible light source (High pressure 250 W Hg vapor lamp)               | Methylene blue | 94.2 %, 120 min (k = 0.0234 min <sup>-1</sup> ) | This work                      |
| Fe-doped CaTiO <sub>3</sub>                                          | UV light source (500 W Hg lamp with a wavelength of 365 nm)            | Methylene blue | 100 %, 180 min                                  | Yang et al. 2014 [1]           |
| Er <sup>3+</sup> - doped CaTiO <sub>3</sub>                          | UV-visible-NIR source (300 W Hg-Xe lamp)                               | Methylene blue | k = 11.90×10 <sup>-5</sup> s <sup>-1</sup>      | Lozano-Sánchez et al. 2015 [2] |
| Substitutional and interstitial N in CaTiO <sub>3</sub>              | 500 W Xe lamp                                                          | Methylene blue | k = 0.0035 min <sup>-1</sup>                    | Han et al. 2016 [3]            |
| N-doped CaTiO <sub>3</sub> /RGO composite                            | Visible light source                                                   | Methylene blue | 95 %, 180 min                                   | Kumar et al. 2017 [4]          |
| Surface disorder-engineered CaTiO <sub>3</sub> nanocuboids           | Solar simulator                                                        | Rhodamine B    | 94.7 %, 180 min                                 | Yan et al. 2018 [5]            |
| Rh doped SrTiO <sub>3</sub> (1.0 Rh)                                 | Visible light source (High pressure 250 W Hg vapor lamp)               | Methylene blue | 72.9 %, 120 min (k = 0.0108 min <sup>-1</sup> ) | Shenoy et al. 2018 [6]         |
| Au@CaTiO <sub>3</sub> composite                                      | Solar simulator (200 W Xe lamp with wavelength range from 300-2500 nm) | Rhodamine B    | 99.6 %, 120 min                                 | Yan et al. 2019 [7]            |
| 2D/1D g-C <sub>3</sub> N <sub>4</sub> /CaTiO <sub>3</sub> composite  | Solar simulator (300 W Xe lamp)                                        | Crystal violet | 99.76 %, 180 min                                | Chen et al. 2020 [8]           |
| Na <sup>+</sup> co-doped CaTiO <sub>3</sub> :Eu <sup>3+</sup> powder | UV light source (35 W Hg lamp with a                                   | Methylene blue | 96.62 %, 300 min                                | Chen et al. 2020 [9]           |

|                                                      |                                                          |                |                                               |                           |
|------------------------------------------------------|----------------------------------------------------------|----------------|-----------------------------------------------|---------------------------|
|                                                      | wavelength of 253.7 nm)                                  |                |                                               |                           |
| MoS <sub>2</sub> /CaTiO <sub>3</sub> heterostructure | 300 W Xe lamp                                            | Tetracycline   | 71.7 %, 60 min                                | Jiang et al. 2020 [10]    |
| V doped SrTiO <sub>3</sub> (1.0 V)                   | Visible light source (High pressure 250 W Hg vapor lamp) | Methylene blue | 83 %, 120 min (k = 0.0124 min <sup>-1</sup> ) | Bantawal et al. 2020 [11] |
| Rh doped BaTiO <sub>3</sub> (0.5 Rh)                 | Visible light source (High pressure 250 W Hg vapor lamp) | Methylene blue | 96 %, 120 min (k = 0.0245 min <sup>-1</sup> ) | Bhat et al. 2020 [12]     |



## References

1. H. Yang, C. Han and X. Xue, Photocatalytic Activity of Fe-Doped CaTiO<sub>3</sub> Under UV–Visible Light, *J. Environ. Sci.*, 2014, **26**, 1489-1495.
2. L. M. Lozano-Sánchez, S. Obregón, L. A. Díaz-Torres, S. W. Lee and V. Rodríguez-González, Visible and Near-Infrared Light-Driven Photocatalytic Activity of Erbium-Doped CaTiO<sub>3</sub> System, *J. Mol. Catal.*, 2015, **410**, 19-25.
3. C. Han, J. Liu, W. Yang, Q. Wu, H. Yang and X. Xue, Enhancement of Photocatalytic Activity of CaTiO<sub>3</sub> through HNO<sub>3</sub> Acidification, *J. Photochem. Photobiol.*, 2016, **322**, 1-9.
4. A. Kumar, S. Kumar, A. Bahuguna, A. Kumar, V. Sharma and V. Krishnan, Recyclable, Bifunctional Composites of Perovskite Type N-CaTiO<sub>3</sub> and Reduced Graphene Oxide as an Efficient Adsorptive Photocatalyst for Environmental Remediation, *Mater. Chem. Front.*, 2017, **1**, 2391-2404.
5. Y. Yan, H. Yang, X. Zhao, R. Li and X. Wang, Enhanced Photocatalytic Activity of Surface Disorder-Engineered CaTiO<sub>3</sub>, *Mater. Res. Bull.*, 2018, **105**, 286-290.
6. U. S. Shenoy, H. Bantawal and D. K. Bhat, Band Engineering of SrTiO<sub>3</sub>: Effect of Synthetic Technique and Site Occupancy of Doped Rhodium, *J. Phys. Chem. C*, 2018, **122**, 27567-27574.
7. Y. Yan, H. Yang, Z. Yi, R. Li and X. Wang, Enhanced Photocatalytic Performance and Mechanism of Au@CaTiO<sub>3</sub> Composites with Au Nanoparticles Assembled on CaTiO<sub>3</sub> Nanocuboids, *Micromachines*, 2019, **10**, 254.
8. X. Chen, X. He, X. Yang, Z. Wu and Y. Li, Construction of Novel 2D/1D g-C<sub>3</sub>N<sub>4</sub>/CaTiO<sub>3</sub> Heterojunction with Face-to-Face Contact for Boosting Photodegradation of Triphenylmethane Dyes Under Simulated Sunlight, *J. Taiwan Inst. Chem. Eng.*, 2020, **107**, 98-109.
9. M. Chen, Q. Xiong, Z. Liu, K. Qiu and X. Xiao, Synthesis and Photocatalytic Activity of Na<sup>+</sup> Co-Doped CaTiO<sub>3</sub>: Eu<sup>3+</sup> Photocatalysts for Methylene Blue Degradation, *Ceram. Int.*, 2020, **46**, 12111-12119.
10. E. Jiang, N. Song, G. Che, C. Liu, H. Dong and L. Yang, Construction of a Z-scheme MoS<sub>2</sub>/CaTiO<sub>3</sub> Heterostructure by the Morphology-Controlled Strategy towards Enhancing Photocatalytic Activity, *Chem. Eng. J.*, 2020, **399**, 125721.
11. H. Bantawal, U. S. Shenoy and D. K. Bhat, Vanadium-Doped SrTiO<sub>3</sub> Nanocubes: Insight into Role of Vanadium in Improving the Photocatalytic Activity, *Appl. Surf. Sci.*, 2020, **513**, 145858.

12. D. K. Bhat, H. Bantawal and U. S. Shenoy, Rhodium Doping Augments Photocatalytic Activity of Barium Titanate: Effect of Electronic Structure Engineering. *Nanoscale Adv.*, 2020, **2**, 5688-5698.
